# Supplementary material for: Quantitation of 4,4′-methylene diphenyl diisocyanate human serum albumin adducts
Source: PubMed Central journal article supplement — Toxicol Rep. 2014 Oct 4;1:743–51. doi: 10.1016/j.toxrep.2014.09.009 (PMC4748379; doi:10.1016/j.toxrep.2014.09.009), 2014-10-04
Supplement: NIHMS747085-supplement-Supplements.pdf [file NIHMS747085-supplement-Supplements.pdf]

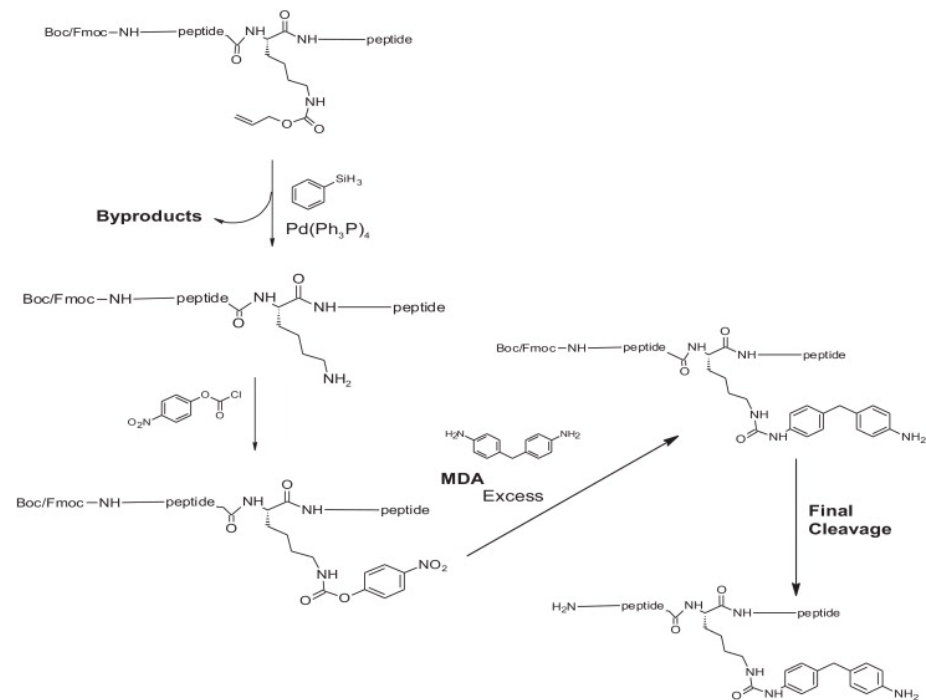

Fig. 1. Synthesis process to adduct MDA to the lysine side chain on a peptide.

Leah G. Luna, Brett J. Green, Fagen Zhang, Scott M. Arnold, Paul D. Siegel, Michael J. Bartels

### Quantitation of 4,4'-methylene diphenyl diisocyanate human serum albumin adducts

Toxicology Reports, Volume 1, 2014, 743–751

<http://dx.doi.org/10.1016/j.toxrep.2014.09.009>

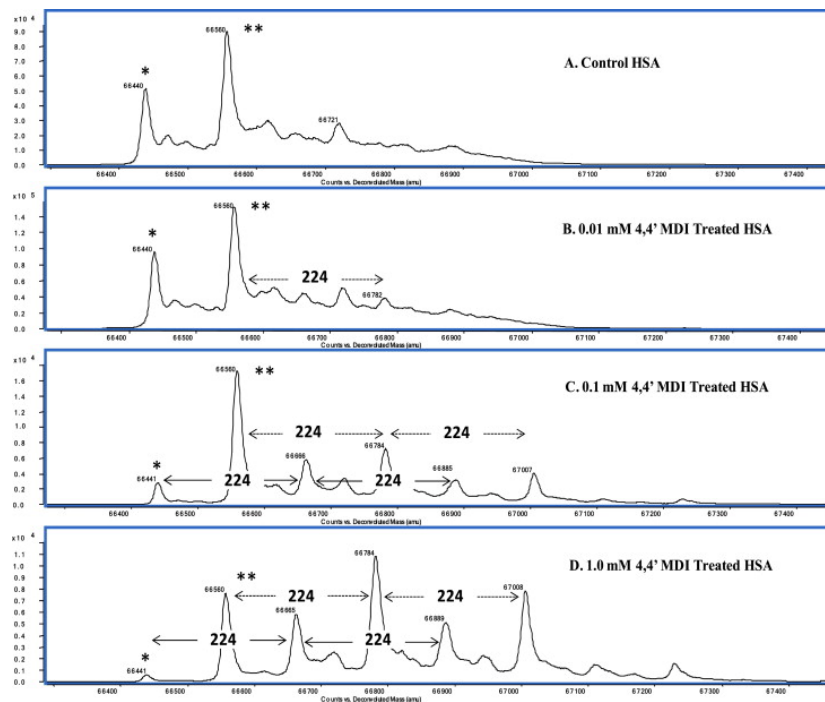

Fig. 2. Deconvoluted full scan mass spectra taken in positive ion electrospray ionization mode of (A) control HSA; (B) 0.01 mM 4,4'-MDI adducted HSA; (C) 0.1 mM 4,4'-MDI adducted HSA; and (D) 1.0 mM 4,4'-MDI adducted HSA. The single asterisk indicates the first...

Leah G. Luna, Brett J. Green, Fagen Zhang, Scott M. Arnold, Paul D. Siegel, Michael J. Bartels

**Quantitation of 4,4'-methylene diphenyl diisocyanate human serum albumin adducts**

Toxicology Reports, Volume 1, 2014, 743–751

<http://dx.doi.org/10.1016/j.toxrep.2014.09.009>

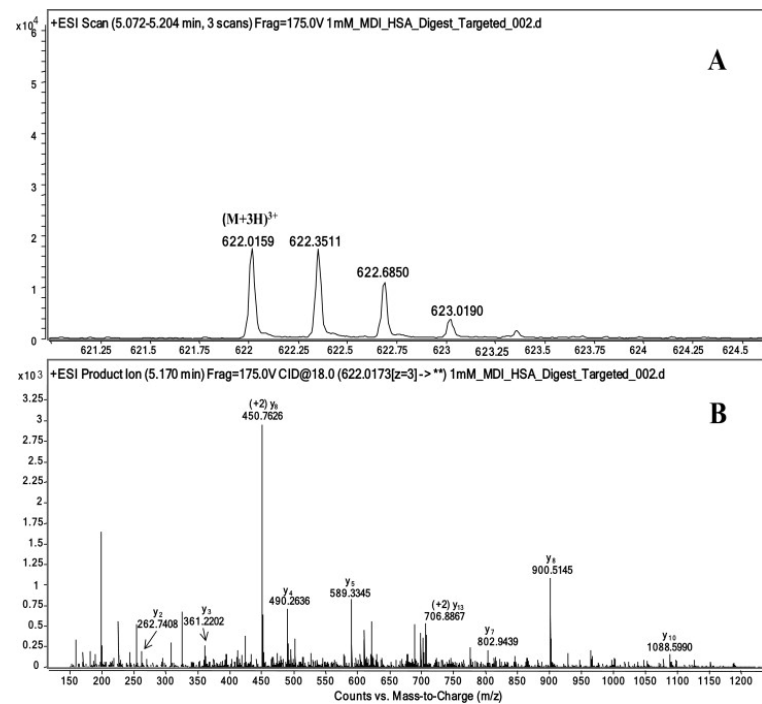

Fig. 3. Adducted peptide KVPQVSTPTLVEVSR (A) full scan and (B) product ion scan.

Leah G. Luna, Brett J. Green, Fagen Zhang, Scott M. Arnold, Paul D. Siegel, Michael J. Bartels

**Quantitation of 4,4'-methylene diphenyl diisocyanate human serum albumin adducts**

Toxicology Reports, Volume 1, 2014, 743–751

<http://dx.doi.org/10.1016/j.toxrep.2014.09.009>

Table 2.

Multiple reaction monitoring transitions and corresponding collision energies for labeled and unlabeled adducted HSA peptides. Underlined lysine (K) indicates the site of MDI adduction.

Adducted  $\uparrow$  Monoisoto Optimized collision energies

|          | Precursor         | Product |    |
|----------|-------------------|---------|----|
| AFKAWAV  | <u>622.3</u> (+2) | 673.1   | 16 |
| KQTALAEL | <u>662.9</u> (+2) | 844.5   | 16 |
| YTK      | 635.3 (+1)        | 371.2   | 16 |
| KVPQVSTP | <u>622.0</u> (+3) | 900.5   | 18 |
|          |                   | 589.3   | 18 |
|          |                   | 450.8   | 18 |
| KVPQVSTP | <u>624.3</u> (+3) | 906.5   | 18 |
|          |                   | 595.3   | 18 |

Table 3.

Summary demographic and classification information for all sera samples.

Parameter Exposed to diisocyanates non-asthmatic n = 7 Exposed to diisocyanates related asthma n = 7 Not exposed to diisocyanates non-asthmatic n = 7 Not exposed to diisocyanates related asthma n = 7

| Parameter             | Exposed to diisocyanates non-asthmatic n = 7 | Exposed to diisocyanates related asthma n = 7 | Not exposed to diisocyanates non-asthmatic n = 7 | Not exposed to diisocyanates related asthma n = 7 |
|-----------------------|----------------------------------------------|-----------------------------------------------|--------------------------------------------------|---------------------------------------------------|
| Gender                |                                              |                                               |                                                  |                                                   |
| Male                  | 13                                           | 8                                             | 8                                                | 1                                                 |
| Female                | 2                                            | 2                                             | 1                                                | 6                                                 |
| Age (years)           | 38.5 ± 9.9                                   | 36.5 ± 9.9                                    | 44.9 ± 7.5                                       | 37.9 ± 11.0                                       |
| Mean (±SD)            | 66.8 ± 83.0                                  | 60.5 ± 54.3                                   | 152.5 ± 10.0                                     | Not applicable                                    |
| Last exposure (years) | 94.8 ± 136.0                                 | 140.9 ± 111.0                                 | 170.9 ± 25.0                                     | Not applicable                                    |
| Challenge (Yes/No)    | No                                           | No                                            | No                                               | No                                                |
| Detect or not detect  | 4 detect                                     | 3 detect                                      | 1 detect                                         |                                                   |
| Sabbioni              | 4 NQ                                         | 1 NQ                                          | 2 NQ                                             | 0 NQ                                              |
| Modified              | 7 ND                                         | 5 ND                                          | 4 ND                                             | 6 ND                                              |

Table S1. MDI exposed worker demographics and classification criteria positive for occupational asthma.

| Code                                   | Diagnosis                   | Age at time of Sampling (years) | Gender | Smoking Status | Exposures in the workplace | Challenge agent | Challenge reaction to MDI | Days between sample collection and last occupational exposure | Duration of Occupational Exposure to Diisocyanates (months) | fmol adduct/mg albumin<br>ND=Not Detectable<br>NQ= Detectable, Non-quantifiable |
|----------------------------------------|-----------------------------|---------------------------------|--------|----------------|----------------------------|-----------------|---------------------------|---------------------------------------------------------------|-------------------------------------------------------------|---------------------------------------------------------------------------------|
| <b>DRA* -1</b>                         | Diisocyanate related asthma | 27.5                            | Male   | Non-smoker     | MDI                        | MDI             | Prolonged immediate       | 1                                                             | 81.7                                                        | NQ                                                                              |
| <b>DRA -2</b>                          | Diisocyanate related asthma | 24.0                            | Male   | Non-smoker     | MDI                        | MDI             | Prolonged immediate       | 4                                                             | 65.9                                                        | NQ                                                                              |
| <b>DRA -3</b>                          | Diisocyanate related asthma | 36.4                            | Male   | Ex-smoker      | MDI                        | MDI             | Immediate                 | 137                                                           | 168.8                                                       | ND                                                                              |
| <b>DRA -4</b>                          | Diisocyanate related asthma | 53.0                            | Male   | Ex-smoker      | MDI                        | MDI             | Progressive               | 238                                                           | 9.0                                                         | ND                                                                              |
| <b>DRA -5</b>                          | Diisocyanate related asthma | 33.6                            | Male   | Non-smoker     | MDI                        | MDI             | Isolated late             | 1                                                             | 58.4                                                        | 7.55                                                                            |
| <b>DRA -6</b>                          | Diisocyanate related asthma | 29.4                            | Male   | Non-smoker     | MDI                        | MDI             | Isolated late             | 130                                                           | 3.1                                                         | 15.7                                                                            |
| <b>DRA -7</b>                          | Diisocyanate related asthma | 42.3                            | Male   | Ex-smoker      | MDI                        | MDI             | Isolated late             | 3                                                             | 16.6                                                        | 8.97                                                                            |
| <b>DRA -8</b>                          | Diisocyanate related asthma | 38.3                            | Male   | Ex-smoker      | MDI                        | MDI             | Early late                | 4                                                             | 35.1                                                        | ND                                                                              |
| <b>DRA -9</b>                          | Diisocyanate related asthma | 35.4                            | Male   | Ex-smoker      | MDI                        | MDI             | Isolated late             | 25                                                            | 80.1                                                        | NQ                                                                              |
| <b>DRA -10</b>                         | Diisocyanate related asthma | 36.1                            | Female | Non-smoker     | MDI                        | MDI             | Dual                      | 185                                                           | 6.0                                                         | ND                                                                              |
| <b>DRA -11</b>                         | Diisocyanate related asthma | 43.4                            | Male   | Ex-smoker      | MDI                        | MDI             | Early late                | 64                                                            | 25.2                                                        | ND                                                                              |
| <b>DRA -12</b>                         | Diisocyanate related asthma | 54.1                            | Male   | Ex-smoker      | MDI                        | MDI             | Late                      | 126                                                           | 39.9                                                        | 15.7                                                                            |
| <b>DRA -13</b>                         | Diisocyanate related asthma | 25.9                            | Male   | Non-smoker     | MDI                        | MDI             | Isolated change in PC20   | 500                                                           | 46.7                                                        | ND                                                                              |
| <b>DRA -14</b>                         | Diisocyanate related asthma | 46.3                            | Male   | Non-smoker     | MDI                        | MDI             | Late                      | 3                                                             | 326.3                                                       | NQ                                                                              |
| <b>DRA -15</b>                         | Diisocyanate related asthma | 52.6                            | Female | Non-smoker     | MDI                        | MDI             | Isolated change in PC20   | 1                                                             | 39.0                                                        | ND                                                                              |
| <b>*Diisocyanate related asthmatic</b> | Mean                        | 38.5                            |        |                |                            |                 |                           | 94.8                                                          | 66.8                                                        |                                                                                 |
|                                        | SD                          | 9.9                             |        |                |                            |                 |                           | 136.9                                                         | 83.0                                                        |                                                                                 |

Table S2. MDI exposed worker demographics and classification criteria negative for asthma (non-asthma of any kind).

| Code                                         | Diagnosis                                        | Age at time of Sampling (years) | Gender | Smoking Status | Exposures in the workplace           | Challenge agent                            | Challenge reaction to MDI | Days between sample collection and last occupational exposure | Duration of Occupational Exposure to Diisocyanates (months) | fmol adduct/mg albumin<br>ND=Not Detectable<br>NQ= Detectable, Non-quantifiable |
|----------------------------------------------|--------------------------------------------------|---------------------------------|--------|----------------|--------------------------------------|--------------------------------------------|---------------------------|---------------------------------------------------------------|-------------------------------------------------------------|---------------------------------------------------------------------------------|
| ENA ^ -1                                     | No diisocyanate related asthma and Non asthmatic | 30.1                            | Female | Smoker         | MDI, HDI, TDI                        | MDI, HDI, TDI, cyanoacrylate               | No Reaction               | 349                                                           | 8.0                                                         | NQ                                                                              |
| ENA -2                                       | No diisocyanate related asthma and Non asthmatic | 24.2                            | Male   | Non-smoker     | MDI                                  | MDI                                        | No Reaction               | 221                                                           | 25.4                                                        | ND                                                                              |
| ENA -3                                       | No diisocyanate related asthma and Non asthmatic | 25.3                            | Male   | Non-smoker     | MDI                                  | MDI                                        | No Reaction               | 133                                                           | 53.9                                                        | ND                                                                              |
| ENA -4                                       | No diisocyanate related asthma and Non asthmatic | 54.7                            | Male   | Ex-smoker      | MDI                                  | MDI                                        | No Reaction               | 3                                                             | 28.5                                                        | ND                                                                              |
| ENA -5                                       | No diisocyanate related asthma and Non asthmatic | 34.6                            | Male   | Smoker         | MDI                                  | MDI                                        | No Reaction               | 102                                                           | 189.9                                                       | ND                                                                              |
| ENA -6                                       | No diisocyanate related asthma and Non asthmatic | 47.4                            | Male   | Smoker         | HDI, MDI, metabisulfite, epoxy resin | HDI, MDI, metabisulfite, epoxy resin       | No Reaction               | 118                                                           | 27.2                                                        | 60.8                                                                            |
| ENA -7                                       | No diisocyanate related asthma and Non asthmatic | 29.8                            | Male   | Non-smoker     | HDI, MDI, TDI, IPDI, methacrylate    | MDI, HDI, TDI, IPDI, methacrylate, recycle | No Reaction               | 145                                                           | 55.1                                                        | 11.3                                                                            |
| ENA -8                                       | No diisocyanate related asthma and Non asthmatic | 38.9                            | Male   | Non-smoker     | MDI                                  | MDI                                        | No Reaction               | 61                                                            | 54.5                                                        | 7.39                                                                            |
| ENA -9                                       | No diisocyanate related asthma and Non asthmatic | 43.6                            | Male   | Non-smoker     | MDI                                  | MDI, latex, welding                        | No Reaction               | 276                                                           | 117.7                                                       | 57.3                                                                            |
| ENA -10                                      | No diisocyanate related asthma and Non asthmatic | 36.8                            | Female | Non-smoker     | MDI                                  | MDI, fiberglass, glue                      | No Reaction               | 1                                                             | 44.7                                                        | ND                                                                              |
| ^Exposed to Diisocyanates, and Non-Asthmatic | Mean                                             | 36.5                            |        |                |                                      |                                            |                           | 140.9                                                         | 60.5                                                        |                                                                                 |
|                                              | SD                                               | 9.9                             |        |                |                                      |                                            |                           | 113.07                                                        | 54.3                                                        |                                                                                 |

Table S3. MDI exposed workers demographics and classification criteria negative for occupational asthma.

| Code                                  | Diagnosis                                 | Age at time of Sampling (years) | Gender | Smoking Status | Exposures in the workplace | Challenge agent                 | Challenge reaction to MDI | Days between sample collection and last occupational exposure | Duration of Occupational Exposure to Diisocyanates (months) | fmol adduct/mg albumin<br>ND=Not Detectable<br>NQ= Detectable, Non-quantifiable |
|---------------------------------------|-------------------------------------------|---------------------------------|--------|----------------|----------------------------|---------------------------------|---------------------------|---------------------------------------------------------------|-------------------------------------------------------------|---------------------------------------------------------------------------------|
| EA†-1                                 | No diisocyanate related asthma, asthmatic | 46.5                            | Male   | Smoker         | MDI, TDI                   | MDI, TDI                        | No Reaction               | 1                                                             | 61.5                                                        | 7.65                                                                            |
| EA3                                   | No diisocyanate related asthma, asthmatic | 56.0                            | Male   | Ex-smoker      | MDI                        | MDI                             | No Reaction               | 563                                                           | 51.0                                                        | 17.2                                                                            |
| EA4                                   | No diisocyanate related asthma, asthmatic | 35.4                            | Male   | Non-smoker     | MDI                        | MDI                             | No Reaction               | 1                                                             | 64.5                                                        | NQ                                                                              |
| EA5                                   | No diisocyanate related asthma, asthmatic | 43.5                            | Male   | Ex-smoker      | MDI, TDI                   | MDI, TDI                        | No Reaction               | 170                                                           | 256.7                                                       | NQ                                                                              |
| EA6                                   | No diisocyanate related asthma, asthmatic | 42.1                            | Male   | Smoker         | MDI                        | MDI, aluminium welding          | No Reaction               | 646                                                           | 303.3                                                       | ND                                                                              |
| EA7                                   | No diisocyanate related asthma, asthmatic | 36.1                            | Male   | Smoker         | MDI                        | MDI                             | No Reaction               | 215                                                           | 9.8                                                         | ND                                                                              |
| EA8                                   | No diisocyanate related asthma, asthmatic | 40.6                            | Male   | Ex-smoker      | MDI                        | MDI                             | No Reaction               | 1                                                             | 174.9                                                       | 10.4                                                                            |
| EA9                                   | No diisocyanate related asthma, asthmatic | 48.1                            | Male   | Smoker         | MDI                        | MDI, MDF, formaldehyde          | No Reaction               | 1                                                             | 270.8                                                       | ND                                                                              |
| EA10                                  | No diisocyanate related asthma, asthmatic | 56.0                            | Female | Ex-smoker      | MDI                        | MDI, methacrylate, formaldehyde | No Reaction               | 3                                                             | 180.3                                                       | ND                                                                              |
| † Exposed to Diisocyanates, Asthmatic | Mean                                      | 44.9                            |        |                |                            |                                 |                           | 177.9                                                         | 152.5                                                       |                                                                                 |
|                                       | SD                                        | 7.5                             |        |                |                            |                                 |                           | 256.1                                                         | 109.3                                                       |                                                                                 |



Table S4. Non exposed worker control demographics and classification criteria.

| Code                                             | Diagnosis | Age at time of Sampling (years) | Gender | Smoking Status | Exposures in the workplace | Challenge agent          | Challenge reaction to MDI | Days between sample collection and last occupational exposure | Duration of Occupational Exposure to Diisocyanates (months) | fmol adduct/mg albumin<br>ND=Not Detectable<br>NQ= Detectable, Non-quantifiable |
|--------------------------------------------------|-----------|---------------------------------|--------|----------------|----------------------------|--------------------------|---------------------------|---------------------------------------------------------------|-------------------------------------------------------------|---------------------------------------------------------------------------------|
| <b>Control ‡ 1</b>                               | No asthma | 25.3                            | Female | Non-smoker     | None                       | pig, hen                 | No Reaction               | 4                                                             | NA                                                          | ND                                                                              |
| <b>Control 2</b>                                 | No asthma | 40.2                            | Female | Smoker         | None                       | pig                      | No Reaction               | 130                                                           | NA                                                          | ND                                                                              |
| <b>Control 3</b>                                 | No asthma | 32.2                            | Male   | Non-smoker     | None                       | Flour                    | No Reaction               | 68                                                            | NA                                                          | ND                                                                              |
| <b>Control 4</b>                                 | No asthma | 46.1                            | Female | Non-smoker     | None                       | Flour                    | No Reaction               | 229                                                           | NA                                                          | 151                                                                             |
| <b>Control 5</b>                                 | No asthma | 24.5                            | Female | Non-smoker     | None                       | silicone, latex,         | No Reaction               | 128                                                           | NA                                                          | ND                                                                              |
| <b>Control 6</b>                                 | No asthma | 43.0                            | Female | Ex-smoker      | None                       | Latex gloves             | No Reaction               | 57                                                            | NA                                                          | ND                                                                              |
| <b>Control 11</b>                                | No asthma | 53.9                            | Female | Non-smoker     | None                       | Woodchips, MDF, melamine | No Reaction               | 2                                                             | NA                                                          | ND                                                                              |
| <b>‡No Diisocyanate exposures, not asthmatic</b> | Mean      | 37.9                            |        |                |                            |                          |                           | 88.3                                                          | 0.0                                                         |                                                                                 |
|                                                  | SD        | 11.0                            |        |                |                            |                          |                           | 80.7                                                          | 0.0                                                         |                                                                                 |
